# Supplementary material for: Multidecadal Land Water and Groundwater Drought Evaluation in Peninsular India
Source: MDPI journal article supplement (doi:10.3390/rs14061486), 2022-03-19
Supplement: s1 [file s1]

Archive with 1 entries (1 files):
- remotesensing-1602698-supplementary.pdf
